1 **Building a tumor atlas: integrating single-cell RNA-Seq data with spatial**  
2 **transcriptomics in pancreatic ductal adenocarcinoma**

3

4 Reuben Moncada<sup>1</sup>, Florian Wagner<sup>1</sup>, Marta Chiodin<sup>1</sup>, Joseph C. Devlin<sup>1</sup>, Maayan  
5 Baron<sup>1</sup>, Cristina H. Hajdu<sup>2</sup>, Diane M. Simeone<sup>2</sup>, and Itai Yanai<sup>1\*</sup>

6

7 <sup>1</sup> Institute for Computational Medicine, NYU School of Medicine, New York

8 <sup>2</sup> Pancreatic Cancer Center, NYU School of Medicine, New York

9

10 **To understand tissue architecture it is necessary to understand both which cell**  
11 **types are present and their physical relationships to one another. Single-cell**  
12 **RNA-Seq (scRNA-Seq) has made significant progress towards the unbiased and**  
13 **systematic characterization of cell populations within a tissue by studying**  
14 **hundreds and thousands of cells in a single experiment. However, the**  
15 **characterization of the spatial organization of individual cells within a tissue has**  
16 **been more elusive. The recently introduced ‘spatial transcriptomics’ method (ST)**  
17 **reveals the spatial pattern of gene expression within a tissue section at a**  
18 **resolution of a thousand 100  $\mu$ m spots across the tissue, each capturing the**  
19 **transcriptomes of ~10-20 cells. Here, we present an approach for the integration**  
20 **of scRNA-Seq and ST data generated from the same sample of pancreatic cancer**  
21 **tissue. Using markers for cell types identified by scRNA-Seq, we robustly**  
22 **deconvolved the cell type composition of each ST spot to generate a spatial atlas**  
23 **of cell proportions across the tissue. Studying this atlas, we found that distinct**  
24 **spatial localizations accompany each of the cell populations that we identified.**  
25 **Our results provide a framework for creating a tumor atlas by mapping single-cell**  
26 **populations to their spatial region, as well as the inference of cell architecture in**  
27 **any tissue.**

## 28 INTRODUCTION

29

30 Tremendous technological advances have enabled a molecular view of cancer at  
31 unprecedented resolution<sup>1</sup>. Single-cell RNA-sequencing (scRNA-Seq) has emerged as  
32 a powerful tool, providing an unbiased and systematic characterization of the cells  
33 present in a given tissue<sup>2-4</sup>. Indeed, the application of scRNA-Seq to patient tumors has  
34 uncovered multiple cancer subtypes, cellular subpopulations, and has highlighted  
35 intercellular cross-talk within the tumor microenvironment<sup>5-12</sup>. Using a non-malignant  
36 cell transcriptome as a reference, large copy number variations across entire  
37 chromosomes can also be inferred from the transcriptomes of malignant cells<sup>7</sup>.  
38 However, due to the necessity of cellular dissociation prior to sequencing of individual  
39 cells, the spatial context for each cell is lost thus limiting insight into the manner by  
40 which they compose a tumor.

41

42 Recently, methods have been introduced that provide spatially resolved transcriptomic  
43 profiling<sup>13-16</sup> on the basis of a limited set of genes (typically less than 20 genes). These  
44 methods are incredibly useful for the integration spatial information with scRNA-Seq  
45 data. For example, *in situ* hybridization (ISH) gene expression atlases have made for  
46 useful references for cellular localization<sup>17,18</sup>. Using the ISH atlas as a guide, these  
47 groups were able to accurately map rare subpopulations in two different organisms  
48 using a small subset of genes. However, such atlases do not exist for solid tumors  
49 which have an unpredictable tissue architecture and gene expression patterns. Thus,  
50 high-throughput and comprehensive mapping of single-cells onto tissue requires robust  
51 integration of multiple methods.

52

53 The recently developed Spatial Transcriptomics (ST) method is unique in its potential  
54 for seamless integration with scRNA-Seq data. ST enables spatially resolved  
55 transcriptomic profiling of tissue sections using spatially barcoded oligo-deoxythymidine  
56 (oligo-dT) microarrays, allowing for unbiased mapping of transcripts over entire tissue  
57 sections<sup>19</sup> (Figure 1). Stahl *et al.* applied ST to characterize unique histological features  
58 of the mouse olfactory bulb and breast cancer tissue, distinguishing genes expressed in

59 invasive cancer versus ductal cancer *in situ*<sup>19</sup>. However, as is the case of previously  
60 reported spatially resolved transcriptomic tools<sup>13,20,21</sup>, a main limitation of the ST method  
61 is its lack of cellular resolution: each spot captures the transcriptomes of ~10-20  
62 neighboring cells. In order to extract the full potential of ST, it would be necessary to  
63 combine its data with a distinct data modality such as scRNA-Seq.

64  
65 Here, we present an integration of scRNA-Seq with the ST method. In our method, a  
66 single-cell tumor suspension is generated and processed using the inDrop platform to  
67 identify clusters and to infer the cellular identity of each one by studying the differentially  
68 expressed genes. From the same tumor, tissue sections are also cryosectioned and  
69 processed using the ST method to provide an unbiased map of all expressed transcripts  
70 across the tissue section. Because each ST spot is a mosaic of transcripts from the  
71 cells present within the spot, we computationally deconvolve each spot to precisely  
72 estimate cell type proportions across the tissue using the scRNA-Seq-identified cell type  
73 markers. We used this approach to study tissue from the same pancreatic ductal  
74 adenocarcinoma (PDAC) tumor (Figure 1). We identified six cell types and used them to  
75 deconvolve the ST data on the PDAC tissue section. We find that different cell types  
76 occupy distinct regions within the tissue that can be matched with the tissue histology.  
77 Our analysis demonstrates the plausibility of using two powerful technologies to  
78 construct a comprehensive cellular atlas for any heterogeneous tissue.

79

## 80 **RESULTS**

81

### 82 **Identifying cell populations in pancreatic cancer with single-cell RNA-Seq**

83

84 Two hours after tumor resection, the PDAC tissue arrived in our lab where it was  
85 immediately processed for scRNA-seq and ST (see Methods). We processed the  
86 single-cell suspension using the inDrop platform<sup>22</sup>, collecting approximately 4,000 cells.  
87 After sequencing, initial analysis, and filtering, 820 transcriptomes remained for analysis  
88 with an average of approximately 4,000 unique molecular identifiers (UMIs) and 1,800  
89 unique genes per cell (Figure S1). Because cells are computationally filtered based on

90 the percentage of ribosomal and mitochondrial transcripts (where a high expression of  
91 mitochondrial genes is an indicator of cell stress), we suspect that the large drop-out in  
92 cells can be attributed to the conditions used for dissociation of the tissue, and the  
93 potentially apoptotic nature of the tumor following surgery.

94

95 We next sought to infer the cell type identities of the 820 cells. To reduce the overall  
96 noise inherent to scRNA-Seq data<sup>23</sup>, we applied our recently developed *k*-nearest  
97 neighbor smoothing algorithm<sup>24</sup>. We then explored the data using multidimensional  
98 scaling (MDS, Figure 2a) and expression heatmaps (Figure 2b). In combination, these  
99 visualizations allowed us to identify six main clusters representing 758 of the 820 cells.  
100 We deliberately left 62 cells unclassified that likely corresponded to rarer cell types and  
101 were difficult to identify given the limited number of cells.

102

103 To infer the cell types of each cluster, we examined the expression profile of individual  
104 marker genes (Figure 2c). The identified T-cell cluster exhibited high expression of  
105 CD8A and CD8B, which are known T-cell receptor genes. The macrophage cluster was  
106 identified by expression of CD14, FCGR3A, HLA-DPA1 (MHC class genes). The  
107 stromal cells likely contain multiple cell types such fibroblasts, endothelial cells, and  
108 pericytes. The cancer cells express TMFSF1, a gene associated with pancreatic cancer  
109 progression<sup>25,26</sup>, and metabolism associated genes such as NNMT and IGF2.

110 Interestingly, over half of our cells represented ductal cells expressing KRT19 and  
111 SPP1. However, we identified two sub-populations of this cell type, which are quite  
112 similar overall yet cluster distinctly in the MDS-analysis (Figure 2a).

113

114 In order to detect differentially expressed genes across the cell types, we performed  
115 pairwise t-tests. This analysis led us to detect genes that are consistently more highly  
116 expressed in one cell type relative to all other cell types, and we identified between 26  
117 to 171 cell type specific genes.

118

119 **Spatial transcriptomics (ST) of pancreatic cancer tissue**

120

121 To generate unbiased gene expression maps of the tissue sections, we mounted 10  $\mu$ m  
122 cryosections of unfixed, OCT-embedded PDAC tissue (originating from the same tumor  
123 used to generate a single-cell suspension) onto the spatially barcoded microarray slides  
124 (see Methods). After staining the tissue with hematoxylin and eosin (H&E), the slide was  
125 presented to a pathologist (C.H.H.) to annotate distinct histological features across the  
126 tissue (Figure 3a-d). We thus defined four regions: (1) high in cancer cells and  
127 desmoplasia, (2) the duct epithelium, (3) normal pancreatic tissue, and (4) inflamed  
128 tissue. The slide was then processed with the ST protocol: involving cDNA synthesis, *in*  
129 *vitro* transcription amplification, library construction, and sequencing<sup>19</sup>. Analyzing the  
130 sequence reads, we demultiplexed the reads and identified their spatial location within  
131 the tissue using the ST spatial-specific barcodes of the array. We detected  
132 approximately 2,000 UMIs and approximately 1,000 unique genes per spot. Mapping  
133 the distribution of UMIs and unique genes over the tissue spots indicates they are  
134 uniformly distributed (Figure S2a-b).

135  
136 We next asked if the ST spot transcriptomes can be clustered into co-expressed  
137 regions. For this, we performed principal components analysis (PCA) on the 1,339 most  
138 dynamically expressed genes across all spots. Figure 3e illustrates the scores of the  
139 first three PCs mapped to the tissue showing distinct tissue regions. The regions  
140 demarcated by these PCs confirm the annotated histological features of the tissue  
141 (Figure 3a). For example, PC1 and PC2-high spots correspond to the cancerous region  
142 of the tissue, whereas PC3-high spots spatially localize to the duct epithelium of the  
143 tissue section. Genes with high loadings for each PC demonstrate similar localization  
144 according to which PC each gene contributes most (*PPDPF* and PC1; *LAMC2* and PC2;  
145 *PIGR* and PC3, Figure 3f).

146  
147 The genes with the highest loadings for each PC enriched for Gene Ontology (GO)  
148 terms reflective of each tissue region. Both the cancerous and inflamed region of the  
149 tissue demonstrated a high PC1 score, which enriched for GO terms related to the  
150 interferon response, as would be expected both in response to inflammation<sup>27</sup> and, in  
151 some cases, in response to tumor growth<sup>28</sup> (Figure S2c). PC2 enriched GO terms

152 included extracellular matrix (ECM) organization and collagen catabolic processes,  
153 perhaps indicating the stromal remodeling taking place in response to, or in support of,  
154 the growth of the tumor<sup>36</sup>. The GO terms enriched in PC3 are highly reflective of the  
155 transport and release of digestive enzymes of the exocrine pancreas, as expected in the  
156 ductal epithelium.

157

## 158 **Deconvolution of spatial transcriptomic data using single-cell transcriptomic data**

159

160 In our previous work on characterizing human and mouse pancreata at single-cell  
161 resolution, we learned cell type-specific expression profiles from single-cell RNA-Seq  
162 data, and used these profiles to estimate individual cell type proportions from bulk gene  
163 expression data<sup>29</sup>. Since the expression profile measured by each spot on the spatial  
164 transcriptomics array can represent a mixture of different cell types, we reasoned that  
165 we could apply an analogous approach here to estimate cell type proportions at each  
166 location in the tissue. However, we found that the limited number of unique transcripts  
167 obtained for most spots made the deconvolution more challenging compared to bulk  
168 RNA-Seq data. We therefore modified the Cibersort deconvolution method<sup>30</sup> to operate  
169 on “metagenes”, which represent aggregates of genes that we determined to exhibit cell  
170 type-specific expression profiles based on our scRNA-Seq data (see Methods).

171 Although we did not identify acinar cells in our scRNA-Seq data, we included previously  
172 identified acinar-specific marker genes to the deconvolution of the ST data<sup>37</sup>, for a total  
173 of seven cell populations.

174

175 Deconvolving each spot transcriptome into individual cell types, we obtained clear  
176 spatial patterns for four cell populations: ductal cells (subtype A), acinar cells, stromal  
177 cells, and cancer cells (Figure 4a). Specifically, our results indicated a co-localization of  
178 cancer cells and stromal cells, whereas ductal cells and acinar cells dominated the  
179 remaining tissue areas. Looking at each population, the regionalization matches what is  
180 expected from the pathology. The cancer cells and stromal cells are restricted to the  
181 annotated cancer and desmoplastic region as expected, while ductal cells are restricted  
182 to the duct epithelium (Figure 4b). To obtain an unbiased view of the localization

183 patterns, we performed unsupervised clustering of the inferred cell type proportions,  
184 which resulted in cluster assignments that again matched the pathology annotations  
185 (Figure 4c).

186

187 We evaluated and quantified the robustness of the deconvolution method using a simulation  
188 study. The underlying notion that we sought to test is whether the results of the  
189 deconvolution are reproducible with a synthetic dataset generated using the cell type  
190 proportions obtained from our initial analysis (see Methods). We found that the model  
191 was generally able to reproduce abundance estimates within a margin of error within  
192 20%. Furthermore, we found that we were able to consistently estimate cell type  
193 proportions of the ductal A cell population (Figure S3). As expected, the more lowly  
194 abundant a cell type is, the more difficult it is to estimate its relative proportion in the  
195 spot (Figure S3).

196

197 Interestingly, the ductal A and B cell subpopulations segregate to distinct spatial regions  
198 in our analysis atlas (Figure 4a). Staining for two markers of these sub-populations  
199 using immunohistochemistry further validated the distinct spatial regionalization  
200 (Figure S4). Further work will be directed towards further characterizing the relationship  
201 between the spatial and function of these sub-populations.

202

## 203 **DISCUSSION**

204

205 As single-cell transcriptomics continues to develop, we are gaining a deeper  
206 appreciation for intratumoral heterogeneity. A long-standing question is how the  
207 composite cells organize themselves relative to each other and relative to the entire  
208 tissue. Here, we describe a method for the identification and mapping of distinct cell  
209 types within a heterogeneous sample onto tissue cryosections. We begin by identifying  
210 and characterizing the cell types present with scRNA-Seq, and in parallel produce  
211 unbiased, transcriptomic maps of the cryosectioned tissue with the ST method. We then  
212 computationally deconvolve the ST expression data across the tissue to map the  
213 identified cell types across tissue sections originating from the same tissue. By applying

214 this method to PDAC tissue, we identify distinct cell populations intrinsic to the tumor  
215 microenvironment (stromal, immune populations, malignant cells) and cell populations  
216 expected from the pancreas tissue itself (pancreatic ductal cells).

217

218 When we deconvolve the ST spots and map the location of cell types across the tissue,  
219 we observe both the cancer and fibroblast cell populations to be restricted to the  
220 cancerous and desmoplastic region (Figure 4a-b). Mapping of these cell types onto the  
221 tissue offers a way to attribute cellular activity (illustrated by enriched GO terms in  
222 Figure 3f) to the cell populations mapped to a region of interest. For example, the PC2  
223 GO terms in particular likely reflect the recruitment of macrophages to the tumor (in the  
224 case of the complement pathway activation<sup>31</sup>) and the activity of fibroblasts (the main  
225 cell type involved in remodeling of the tumor stroma<sup>32</sup>). Therefore, our integrative tumor  
226 atlas provides an in-depth view of the biochemical and physiologic activities underlying  
227 the cell-populations present.

228

229 By integrating two largely orthogonal approaches, we extend existing single-cell  
230 transcriptomic analyses by spatially mapping the identified cell types onto tissue  
231 sections from the same sample. Other methods for mapping transcripts (ISH, FISH) or  
232 proteins (immunohistochemistry, IHC) are limited to a single antibody or *in situ* probe  
233 per tissue section. When multiplexing antibodies or probes, one is still limited by the  
234 number of targets to visualize simultaneously. The ST method allows for unbiased  
235 visualization of all expressed transcripts across the same tissue section. Because the  
236 ST method measures all transcripts across the tissue, it overcomes the limitation of a  
237 single target per tissue section.

238

239 An added advantage of our integration is the mapping of cell-populations onto irregular  
240 tissue architectures. Other current approaches to spatially map scRNA-Seq data onto  
241 tissue requires the use of an ISH atlas of the tissue of interest in order to guide cell-  
242 localization<sup>17,18</sup>. These approaches are therefore unsuitable for tissues without ISH  
243 maps to guide cell-location inference. Here, the ST method provides an unbiased map



244 of all expressed transcripts regardless of tissue architecture<sup>33,34</sup>, allowing for seamless  
245 integration of scRNA-Seq and ST data for any tissue of interest.

246

247 Despite the potential of this integrated method, there are a number of limitations. First,  
248 we are limited by some of the technical features of the current ST implementation. Each  
249 array is about 6 x 6 mm in size, comprised of just over 1000 spots, each spot being 100  
250  $\mu\text{m}$  in diameter and 100  $\mu\text{m}$  apart; thus the array is neither large enough to cover the  
251 entire tissue, nor dense enough to provide single-cell resolution.. Additionally the tissue  
252 dissociated for scRNA-Seq comes from the biological sample but is not the same exact  
253 tissue used for ST. Thus, for reliable deconvolution of the ST data it is crucial to capture  
254 the most abundant cell types present in the tissue.

255

256 The construction of a tumor atlas has far reaching impact, particularly with regard to the  
257 identification and classification of cell-populations that comprise such a heterogeneous  
258 tissue. The advent of scRNA-Seq has allowed for the identification of cancer subtypes  
259 and non-malignant cell subpopulations<sup>10,35</sup>; the framework for atlas construction  
260 described here can aid in assigning potential functional roles of cellular subtypes based  
261 on spatial localization (relative to the tissue, or relative to the other cells present). By  
262 applying scRNA-Seq and ST on the same biological sample as we describe here, rare  
263 subpopulations specific to the sample can be mapped to the same tissue of origin. In  
264 the case of tumors for which the precise composition of different tumor sub-  
265 classifications are likely to vary from individual to individual, the subtype composition  
266 and spatial localization can be ascertained for a given patient, and can perhaps be  
267 correlated with patient outcome.

## 268 **METHODS**

### 269 **Tumor sample handling and dissociation to a single-cell suspension.**

270 The pancreatic ductal adenocarcinoma tumor was delivered in RPMI (Fisher Scientific)  
271 on ice directly from the operating room to the lab after clearing pathology (~2 hours).  
272 The tumor resection was rinsed in ice cold PBS and cut into ~4-5 mm<sup>3</sup> pieces from  
273 which 1 mm thick slices were taken and set aside in ice-cold PBS. The remaining ~3-4  
274 mm<sup>3</sup> pieces were embedded in chilled OCT and snap-frozen in isopentane cooled with  
275 liquid N<sub>2</sub>. The 1 mm tissue slices stored in PBS was further minced with scalpels to < 1  
276 mm<sup>3</sup>. Tissue was rinsed from the dish with ice cold PBS and pelleted by centrifuging at  
277 300 x g for 3 minutes at 4 degrees. PBS was aspirated and 5 ml 0.25% pre-warmed  
278 trypsin-EDTA with 10 U/μl DNaseI (Roche) was added and put into a 37°C water bath  
279 for 30 minutes with gentle inversion every 5 minutes. The resulting suspension was  
280 filtered through a 100 μm cell strainer to remove larger chunks of undigested tissue.  
281 Enzymatic digestion was quenched with the addition of FBS to a final concentration of  
282 10%. Cells were pelleted by centrifuging the suspension at 300 x g for 3 minutes at 4  
283 degrees and washed twice with 5 ml ice-cold PBS. After a final spin at 300 x g for 3  
284 minutes, the cells were resuspended in PBS to a final concentration of 10,000 cells/ml.  
285 The resulting viability was >95% as shown by trypan blue exclusion.

286

### 287 **inDrop library preparation and scRNA-Seq.**

288 From the single-cell suspension, 4,000 cells were encapsulated using the inDrop  
289 platform and reverse transcription (RT) reaction was performed as previously  
290 described<sup>29</sup>. The number of PCR cycles performed for final library amplification ranged  
291 from 9-12 cycles. Libraries were diluted to 4 nM and paired end sequencing was  
292 performed on an Illumina NextSeq platform. Between 139 million and 145 million paired  
293 reads were generated for each library, corresponding to approximately 35,000 paired  
294 reads per cell.

295

### 296 **Processing of inDrop single-cell RNA-Seq sequencing data**

297 Raw sequencing data obtained from the inDrop method were processed using a  
298 custom-built pipeline, available online (<https://github.com/flo-compbio/singlecell>). Briefly,

299 the “W1” adapter sequence of the inDrop RT primer was located in the barcode read  
300 (the second read of each fragment), by comparing the 22-mer sequences starting at  
301 positions 9-12 of the read with the known W1 sequence  
302 (“GAGTGATTGCTTGTGACGCCTT”), allowing at most two mismatches. Reads for  
303 which the W1 sequence could not be located in this way were discarded. The start  
304 position of the W1 sequence was then used to infer the length of the first part of the  
305 inDrop cell barcode in each read, which can range from 8-11 bp, as well as the start  
306 position of the second part of the inDrop cell barcode, which always consists of 8 bp.  
307 Cell barcode sequences were mapped to the known list of 384 barcode sequences for  
308 each read, allowing at most one mismatch. The resulting barcode combination was  
309 used to identify the cell from which the fragment originated. Finally, the UMI sequence  
310 was extracted, and reads with low-confidence base calls for the six bases comprising  
311 the UMI sequence (minimum PHRED score less than 20) were discarded. The reads  
312 containing the mRNA sequence (the first read of each fragment) were mapped by STAR  
313 2.5.1 with parameter “—outSAMmultNmax 1” and default settings otherwise<sup>36</sup>. Mapped  
314 reads were split according to their cell barcode and assigned to genes by testing for  
315 overlap with exons of protein-coding genes. Only single-cell transcriptomes with  $\geq 1000$   
316 UMIs,  $\leq 20\%$  mitochondrial transcripts and  $\leq 30\%$  ribosomal transcripts were kept,  
317 leaving 820 cells for analysis.

318

### 319 **Hierarchical clustering of single-cell RNA-Seq data**

320 For hierarchical clustering, we first excluded 13 protein-coding genes located on the  
321 mitochondrial chromosome from the data (MT-ATP6, MT-ATP8, MT-CO1, MT-CO2,  
322 MT-CO3, MT-CYB, MT-ND1, MT-ND2, MT-ND3, MT-ND4, MT-ND4L, MT-ND5, MT-  
323 ND6). We then applied k-nearest neighbor smoothing<sup>24</sup> with  $k=15$ , and normalized  
324 (scaled) each expression profile to the median total transcript count (after smoothing).  
325 We then applied the Freeman-Tukey transformation  $y=\sqrt{x} + \sqrt{x+1}$  for variance  
326 stabilization, and selected the 1,000 genes with the largest variance. We then applied  
327 hierarchical clustering on both the genes and the cells, using the  
328 `scipy.cluster.hierarchy.linkage` function from `scipy` version 1.0.0. For clustering genes,  
329 we used the correlation distance metric, and for clustering cells, we used the Euclidean

330 distance metric. In both cases, we used average linkage. We used the gene and cell  
331 orderings obtained from these hierarchical clusterings to arrange the genes and cells in  
332 a heatmap of a matrix smoothed with  $k=31$  (shown in Figure 2).

333

### 334 **Multidimensional scaling of single-cell RNA-Seq data**

335

336 Multidimensional scaling was performed on the data after smoothing ( $k=15$ ),  
337 normalization, variance-stabilization, and filtering for the 1,000 most variable genes, as  
338 described above. The implementation used was the `sklearn.manifold.MDS` class from  
339 scikit-learn version 0.19.1, with settings `max_iter=1000`, `n_init=10`, and default  
340 parameters otherwise. 2.5% of jitter in both dimensions was added to improve the  
341 readability of the figure.

342

### 343 **Selection of genes with population-specific expression patterns based on single-** 344 **cell RNA-Seq data**

345 As described in the Results section, we manually defined clusters corresponding to  
346 individual cell populations, by inspecting the expression patterns of known marker  
347 genes in our heatmap and MDS visualizations. Based on these cluster assignments, we  
348 then systematically identified genes with population-specific expression patterns using  
349 the following strategy: We first merged our single-cell RNA-Seq data with acinar cells  
350 from human pancreatic islet sample 1 from Baron et al<sup>29</sup>. To ensure consistency, we  
351 downloaded the raw sequencing data from the NCBI Sequence Read Archive (SRA;  
352 accession SRX1935938) and processed them using the same pipeline that we used to  
353 process our single-cell RNA-Seq data (see above). We filtered for cells with at least  
354 1,000 unique transcripts (UMIs), resulting in a dataset containing 2,109 cells. We  
355 removed mitochondrial protein-coding genes (see above), and applied k-nearest  
356 neighbor smoothing with  $k=15$ . A set of 161 acinar was then easily identified by virtue of  
357 their high and specific expression of the known marker gene PRSS1 (i.e., above 5,000  
358 TPM, whereas the average expression in all other cells was 68 TPM). These cells were  
359 added to our single-cell RNA-Seq dataset, resulting in a dataset containing  
360  $820+161=981$  cells. We next applied the Freeman-Tukey transform ( $y=\sqrt{x} +$

361 sqrt(x+1) to this dataset as a variance-stabilizing transformation. To assess whether a  
362 gene was specifically expressed in a particular population (e.g., acinar cells), we  
363 compared the expression level of the gene in that population to that of each other  
364 population by calculating t-test statistics, one for each other population. We used the  
365 formula for the t-test statistic of an independent two-sample t-test (assuming equal  
366 variance), and retained the smallest (worst) test statistic across all pair-wise  
367 comparisons. We then used 2.392 as a threshold for the t-test statistic, as it represented  
368 the value that corresponded to a one-sided p-value of 0.01 for a comparison between  
369 the two populations with the smallest number of cells (T cells: n=19; macrophages:  
370 n=41; corresponding to a t-test with  $41+19-2=58$  degrees of freedom). For genes where  
371 the minimum t-test statistic exceeded this threshold, we then calculated the fold change  
372 in mean expression level for all other populations, retained the minimum value, and  
373 required this to be at least 1.2.

374

#### 375 **Tissue preparation, cryosectioning, fixation, staining, and brightfield imaging**

376 Patients at NYU Langone Health consented preoperatively to participate in the study.  
377 PDAC tumor tissue arrived in RPMI (Fisher Scientific) on ice. Tissue was gently washed  
378 with cold 1X-PBS, and 4-5 mm<sup>3</sup> cubes were removed with a scalpel for OCT-  
379 embedding. Tissue was transferred from 1X PBS to a dry, sterile 10-cm dish and gently  
380 dried prior to equilibration in cold OCT for 2 minutes. The tissue was then transferred to  
381 a tissue-mold with OCT and snap-frozen in liquid nitrogen-chilled isopentane. Tissue  
382 blocks were stored at -80°C until further use.

383

384 Prior to cryosectioning, the cryostat was cleaned with 100% ethanol, and equilibrated to  
385 an internal temperature of -18°C for 30 minutes. Once equilibrated, OCT embedded  
386 tissue blocks were mounted onto the chuck and equilibrated to the cryostat temperature  
387 for 15-20 minutes prior to trimming. ST slide was also placed inside cryostat to keep the  
388 slide cold and minimize RNase activity. Sections were cut at 10 μm sections and  
389 mounted onto the ST arrays, and stored at -80°C until use, maximum of two weeks.

390

391 Prior to fixation and staining, the ST array was removed from the -80C and into a  
392 RNase free biosafety hood for 5 minutes to bring to room temperature, followed by  
393 warming on a 37°C heat block for 1 minute. Tissue was fixed for 10 minutes with 3.6%  
394 formaldehyde in 1X PBS, and subsequently rinsed in 1x PBS. Next, the tissue was  
395 dehydrated isopropanol for 1 minute followed by staining with hematoxylin and eosin.  
396 Slides were mounted in 65 µl 80% glycerol and brightfield images were taken on a Leica  
397 SCN400 F whole-slide scanner  
398 at 40X resolution.

399

#### 400 **Spatial Transcriptomics (ST) barcoded microarray slide information**

401 Library preparation slides used were purchased from the Spatial Transcriptomics team  
402 (<https://www.spatialtranscriptomics.com>; lot 10002). Each of the spots printed onto the  
403 array is 100 µm in diameter and 200 µm from the center-to-center, covering an area of  
404 6.2 by 6.6 mm. Spots are printed with approximately  $2 \times 10^8$  oligonucleotides containing  
405 an 18-mer spatial barcode, a randomized 7-mer UMI, and a poly-20TVN transcript  
406 capture region<sup>19</sup> (Figure 1).

407

#### 408 **On-slide tissue permeabilization, cDNA synthesis, probe release**

409 After brightfield imaging, the ST slide was prewarmed to 42°C and attached to a pre-  
410 warmed microarray slide module to form reaction chambers for each tissue section. The  
411 sections were pre-permeabilized with 0.2 mg/ml BSA and 200 units of collagenase  
412 diluted in 1X HBSS buffer for 20 minutes at 37°C, and washed with 100 µl 0.1X SSC  
413 buffer twice. Tissue was permeabilized with 0.1% pepsin in HCl for 4 minutes at 42°C  
414 and washed with 100 µl 0.1X SSC buffer twice.

415

416 Reverse transcription (RT) was carried overnight (~18-20h) at 42°C by incubating  
417 permeabilized tissue with 75 µl cDNA synthesis mix containing 1X First strand buffer  
418 (Invitrogen), 5 mM DTT, 0.5 mM each dNTP, 0.2 µg/µl BSA, 50 ng/µl Actinomycin D,  
419 1% DMSO, 20 U/µl Superscript III (Invitrogen) and 2U/µl RNaseOUT (Invitrogen)

420

421 Prior to removal of probes, tissue was digested away from the slide by incubating the  
422 tissue with 1% 2-mercaptoethanol in RLT buffer (Qiagen) for one hour at 56°C with  
423 interval shaking. Tissue was rinsed gently with 100 µl 1X SSC, and further digested with  
424 proteinase K (Qiagen) diluted 1:8 in PKD buffer (Qiagen) at 56°C for 1 hour with interval  
425 shaking. Slides were rinsed in 2X SSC with 0.1% SDS, then 0.2X SSC, and finally in  
426 0.1X SSC.

427  
428 Probes were released from the slide by incubating arrays with 65 µl cleavage mix  
429 (8.75 µM of each dNTP, 0.2 µg/µl BSA, 0.1 U/µl USER enzyme (New England Biolabs)  
430 and incubated at 37 °C for 2 hours with interval mixing. After incubation, 65 µl of cleaved  
431 probes was transferred to 0.2 ml low binding tubes and kept on ice.

432  
433 **ST library preparation and sequencing**

434 Libraries were prepared from cleaved probes as previously described, with the following  
435 changes. Briefly, after RNA amplification by *in vitro* transcription (IVT) and subsequent  
436 bead clean-up, second RT reaction was performed using random hexamers, eliminating  
437 the need for a primer ligation step<sup>37</sup>

438  
439 To determine the number of PCR cycles needed for indexing, 2 µl of the purified cDNA  
440 was mixed with 8 µl of a qPCR mixture [1.25x KAPA HiFi HotStart Readymix (KAPA  
441 Biosystems), 0.625 µM PCR InPE1 primer, 12.5 nM PCR InPE2 primer, 0.625 µM PCR  
442 Index primer, 1.25xEVA green (Biotium). Reactions were amplified on a Bio-Rad qPCR  
443 using the following program: 98 °C for 3 minutes, followed by 25 cycles of 98°C for 20 s,  
444 60°C for 30 s and 72°C for 30 s. Optimal cycle number approximated to be the number  
445 of cycles required to reach saturation of signal minus 3-4 cycles to reach the  
446 exponential phase of the amplification.

447  
448 The remaining purified cDNA was indexed and using the same program described  
449 above, except amplified at the pre-determined number of cycles and with the inclusion  
450 of a final 5 minute extension at 72°C. Average lengths of the indexed, purified libraries  
451 were assessed using a 2100 Bioanalyzer (Agilent) and concentrations were measured

452 using a Qubit dsDNA HS Assay Kit (Life Technologies), according to the manufacturer's  
453 instructions.

454

455 Libraries were diluted to 4 nM and paired-end sequencing was performed on an Illumina  
456 NextSeq sequencer with 31 cycles for read 1, and 46 cycles for read 2. Between 100  
457 and 125 million raw read-pairs were generated for each sequenced library.

458

459 Primer sequences:

460 *PCR InPE 1:*

461 5'-

462 AATGATACGGCGACCACCGAGATCTACACTCTTTCCCTACACGACGCTCTTCCGAT  
463 CT-3'

464 *PCR InPE 2:*

465 5'-GTGACTGGAAGTTCAGACGTGTGCTCTTCCGATCT-3'

466 *Cy3 anti-A probe:*

467 [Cy3]AGATCGGAAGAGCGTCGTGT

468 *Cy3 anti-frame probe:*

469 [Cy3]GGTACAGAAGCGCGATAGCAG

470

#### 471 **ST spot selection and image alignment**

472 Upon removal of probes from ST slide, the slide is kept at 4°C for up to 3 days. The  
473 slide was placed into a microarray cassette and incubated with 70 µl of hybridization  
474 solution (0.2 µM Cy3-A-probe, 0.2 µM Cy3 Frame probe, in 1X PBS) for 10 minutes at  
475 room temperature. The slide was subsequently rinsed in 2X SSC with 0.1 % SDS for 10  
476 minutes at 50°C, followed by 1 minute room temperature washes with 0.2X SSC and  
477 0.1X SSC. Fluorescent images were taken on a Hamamatsu NanoZoomer whole-slide  
478 fluorescence scanner. Brightfield images of the tissue and fluorescent images were  
479 manually aligned with Adobe Photoshop CS6 to identify the array spots beneath the  
480 tissue.

481

#### 482 **ST library sequence alignment and annotation**



483 Reads with long stretches of poly A/T/C/G (15 or more) were removed, followed by  
484 BWA-based quality trimming. Remaining reads with less than 28 bp were removed.  
485 Reads were then mapped against the human genome (Ensembl GRCh38) with STAR  
486 v2.4 with default parameters, and counted using HTseq (count mode: union). Each  
487 mapped, annotated read was demultiplexed by pairing with its corresponding forward  
488 read containing the spatial barcode ID. Paired reads with a spatial barcode not present  
489 in the reference barcode file were discarded, as were duplicates based on UMI  
490 information.

491

### 492 **Analysis of ST data**

493 UMI counts in each spot were normalized by the total number of transcripts per spot  
494 and then multiplied by a scale factor equivalent to the median number of transcripts per  
495 spot (TPM). A pseudocount of 1 was added prior to log<sub>10</sub> transformation. For PCA of  
496 spots, the ~1300 most variable genes were selected (defined by the Fano factor above  
497 a mean-dependent threshold). PC scores for the first three components was then  
498 plotted for each spot corresponding to PDAC tissue.

499

### 500 **Gene Ontology enrichment analysis**

501 Genes were determined to have a high loading for a PC if the coefficient  $> \sqrt{(1/N)}$ ,  
502 where N = number of genes. To get Gene Ontology (GO) terms enriched for each gene  
503 set, the genes were first converted the 'ENTREZ\_GENE\_ID' format (default option) with  
504 DAVID 6.8 (<https://david.ncifcrf.gov/>). After format conversion, the appropriate species  
505 was then selected and annotated with DAVID 6.8. After functional annotation clustering,  
506 GO terms with p values  $\geq 0.05$  were considered.

507

### 508 **Deconvolution of spatial transcriptomics expression profiles into cell type 509 proportions using a modification of the Cibersort method**

510 To overcome the noisiness of individual gene expression measurements inherent in the  
511 spatial transcriptomics data, we used the genes with population-specific expression  
512 patterns (see above) to define seven "metagenes", one per population. Each population  
513 metagene simply corresponds to the average expression values of all genes specifically

514 expressed in that population. We then calculated a “metagene basis matrix”. Similarly,  
515 we calculated the metagene expression matrix for our spatial transcriptomics data, and  
516 then used both matrices as the basis for deconvolution with Cibersort<sup>30</sup>. Cibersort  
517 applies support vector regression with a linear kernel to estimate cell type proportions. It  
518 implicitly assumes that all cell populations are represented in the basis matrix, and  
519 rescales the inferred cell type coefficients so that they sum to one, setting negative  
520 coefficients to zero in the process. We used our own Python implementation of the  
521 method, which mirrors the R implementation provided by Newman et al. and relies on  
522 the sklearn.svm.NuSVR class from scikit-learn 0.19.1.

523

### 524 **Evaluation of the robustness of the metagene deconvolution approach using** 525 **synthetic data**

526 To evaluate the extent to which our metagene-based deconvolution approach was able  
527 to reliably quantify cell type abundances, we applied a strategy in which we first  
528 generated synthetic spatial transcriptomics data using the cell type proportions  
529 estimated in our deconvolution analysis, and then re-apply the deconvolution method,  
530 testing whether it is able to reproduce the same abundance estimates from these data  
531 (inspired by modeling work in the field of neurobiology<sup>38</sup>. If our method was unreliable  
532 (as an extreme case, imagine that its abundance estimates were random), then it would  
533 not be able to produce consistent estimates, and consequently fail this test. To generate  
534 the synthetic data, we first calculated “true” expression profiles for each population from  
535 our single-cell RNA-Seq data, by averaging the expression profiles of all cells assigned  
536 to one population, and then created mixture profiles for each spot by combined the true  
537 profiles according to the proportions estimated in our deconvolution analysis. To account  
538 for the fact that each spot on the spatial transcriptomics array only produced a few  
539 thousands transcripts, we sampled matching numbers of transcripts using the Poisson  
540 distribution, following the same strategy we have described previously<sup>24</sup> for simulated  
541 single-cell RNA-Seq data. We then calculated metagene expression patterns for the  
542 sampled data, and then re-applied Cibersort on this synthetic data. We repeated this  
543 simulation 15 times independently.

544

## 545 **Deconvolving ST spots into cell type proportions**

546 To deconvolve each ST spot into cell type proportions, we used an R implementation of  
547 the Bseq-SC algorithm (<https://github.com/shenorrLab/bseqsc>) that takes as input: the  
548 raw ST and scRNA-Seq UMI count matrices, a vector of cell type labels for each cell in  
549 the scRNA-Seq count matrix, and a list of marker genes (chosen using the criteria  
550 described above). The output is a matrix of proportions of each cell type identified by  
551 scRNA-Seq in each ST spot.

552

## 553 **Immunohistochemical staining**

554 Tissue blocks were cryosectioned at a thickness of 5  $\mu\text{m}$  prior to mounting onto  
555 SuperFrost slides (ThermoFisher). Sections were fixed with cold 100% methanol for 10  
556 minutes at  $-20^{\circ}\text{C}$ . Slides were washed twice with 1X TBS for 5 minutes prior to  
557 incubation with 3%  $\text{H}_2\text{O}_2$  for 10 minutes at room temperature. Next, slides were blocked  
558 with blocking solution(0.3%Triton-X 100 and 5% goat serum (Cell Signaling Technology,  
559 Cat. 5425) diluted in 1X TBS ) for 1 hour at room temperature. Slides were incubated  
560 with the AQP3 primary antibody (1:200, Abcam cat. ab85903) or CA9 primary antibody  
561 (1:1000 Novus Biologicals, cat. NB100-417) for 30 minutes at room temperature. Goat  
562 anti-rabbit secondary antibody (Abcam, cat no. ab6721) was added to the slides and  
563 incubated at room temperature for 30 minutes. Secondary antibody was removed and  
564 slides were washed three times in 1X TBS for 5 minutes each. After washes 400  $\mu\text{l}$  ABC  
565 reagent (Vectastain ABC Kit, cat. PK-6100) was added to slides and incubated at room  
566 temperature for 30 minutes. The ABC reagent was removed and slides were washed  
567 three times in 1X TBS for 5 minutes each. To monitor staining 400  $\mu\text{l}$  of DAB reagent  
568 (DAB Substrate Kit, Abcam cat no. ab64238) was added until sections developed.  
569 Slides were then immersed in  $\text{dH}_2\text{O}$  and washed twice for 5 minutes each. Sections  
570 were dehydrated in 95% ethanol two times for 10 seconds, twice in 100% ethanol for 10  
571 seconds, and twice in xylene for 10 seconds.

572

573

574 **FIGURE CAPTIONS**

575

576 **Figure 1. A schematic for the integration of scRNA-Seq and ST.** A surgically  
577 resected PDAC tumor sample was split and processed in parallel by scRNA-Seq and  
578 ST. scRNA-Seq was performed using inDrop<sup>22</sup> to produce a gene expression matrix.  
579 After clustering, the cell type of each cluster is inferred according to specifically  
580 expressed genes. A cryosection of an OCT embedding of the rest of the sample was  
581 used for ST<sup>19</sup> analysis to produce a gene expression matrix where each column is a  
582 spot transcriptome. Integrating the two datasets allows us to deconvolve each spot into  
583 its comprising cell types

584

585 **Figure 2. Identifying cell types present in a PDAC tumor sample.**

586 (a) Multidimensional scaling analysis on the 820 single-cell RNA-Seq transcriptomes.

587 The analysis is shown for the 1,000 most dynamically expressed genes. The cells  
588 are colored according the hierarchical clustering (see Text).

589 (b) Heatmap showing the gene expression of the 1,000 dynamically expressed genes  
590 across the 820 cells. The bottom bar indicates the cell clusters generated by  
591 hierarchical clustering. Expression values are standardized by gene such that the  
592 mean and standard deviation are 0 and 1, respectively.

593 (c) Same as (b) for the indicated cell type marker genes.

594

595 **Figure 3. Pancreatic cancer spatial transcriptomics analysis**

596 (a) Annotated H&E staining of a section of PDAC tumor tissue on the ST slide. The  
597 annotations indicate a region high in cancer cells and desmoplasia (red), normal  
598 pancreatic tissue (blue), normal duct tissue (yellow), and inflammation (green). Note  
599 the spots in the background.

600 (b) Inset of pancreatic tumor tubules and surrounding desmoplasia. White arrowheads  
601 point to tumor cells organizing around tubules. Black arrowheads show the  
602 surrounding stroma and desmoplasia.

603 (c) Inset of healthy pancreatic tissue. Arrowheads indicate the acini.

- 604 (d) Inset of duct epithelium and inflamed tissue. White arrowheads indicate the  
605 pancreatic ducts and the black arrowheads point to inflammatory cells with smaller  
606 nuclei.
- 607 (e) Principal components analysis on the spot transcriptomes. Color in each plot  
608 indicates the score for the PC. Note the regional localization of expression.
- 609 (f) Spatial gene expression profiles for the indicated three genes. Each gene was  
610 picked on the basis of high loadings for a particular PC.

611

612 **Figure 4. Deconvolution of spatial transcriptome data with scRNA-Seq-defined**  
613 **cell type markers.**

- 614 (a) Heat maps indicating the cell type proportions for each of the studied cell types. For  
615 each map the color indicates the proportion of that cell type in the location.
- 616 (b) Cell type proportions across the entire studied tissue section. Each pie-chart  
617 indicates the cell type proportions at the particular spatial location.
- 618 (c) Unsupervised clustering of spot proportions. Using the proportions of each cell type  
619 across the spots, spots were clustered by k-means clustering to delineate four  
620 distinct spot clusters. The pie charts indicate average proportion of each cell type  
621 within each spot cluster.

622

623 **SUPPLEMENTARY FIGURES**

624

625 **Figure S1. inDrop statistics.**

- 626 (a) Histogram of unique transcripts per cell ( $\log_{10}$ ).
- 627 (b) Histogram of unique genes per cell.

628

629 **Figure S2. Spatial Transcriptomics (ST) statistics.**

- 630 (a) Histogram of unique transcripts detected per spot (top), heatmap of unique  
631 transcripts plotted over ST spots (bottom).
- 632 (b) Histogram of unique genes detected per spot (top), heatmap of unique genes plotted  
633 over ST spots (bottom).

634 (c) Gene Ontology terms for genes with high loadings. Genes contributing most to the  
635 first three PCs were annotated using DAVID 6.8<sup>39</sup>.

636

637 **Figure S3. Robustness of metagene deconvolution approach tested using**  
638 **synthetic data.** For each spot, a new synthetic spatial transcriptomics profile was  
639 generated using the cell type proportions inferred by the original deconvolution analysis  
640 (see Methods). Then, the metagene expression profiles was calculated for the synthetic  
641 profile and deconvolution was applied again. Shown is the error for the obtained  
642 abundances relative to the original abundance estimates, for individual populations.  
643 Spots are binned by abundance, and bars and error bars show mean and standard  
644 deviations across all spots in each bin.

645

646 **Figure S4. Immunohistochemical staining of ductal cell sub-population markers.**

647 (a) AQP3 immunohistochemical staining of pancreatic cancer tissue. From the same  
648 tissue block used for ST analysis (Figure 3), 5 µm frozen tissue sections were  
649 stained for AQP3, a marker for the ductal A population (Figure 2).

650 (b) Inset of ductal epithelium lining. Black arrows indicate positive AQP3 staining.

651 (c) Same as a) for CA9 immunohistochemical staining for the ductal B population.

652 (d) Inset of the ductal epithelium lining (left inset) and cancerous region (right inset) of  
653 tissue section. Black arrows indicate positive CA9 staining, white arrows indicate  
654 negative/weak CA9 staining.

655 **References:**

656

- 657 1. Offit, K. A decade of discovery in cancer genomics. *Nat. Rev. Clin. Oncol.* **11**,  
658 632–634 (2014).
- 659 2. Kolodziejczyk, A. A., Kim, J. K., Svensson, V., Marioni, J. C. & Teichmann, S. A.  
660 The Technology and Biology of Single-Cell RNA Sequencing. *Mol. Cell* **58**, 610–  
661 620 (2015).
- 662 3. Papalexis, E. & Satija, R. Single-cell RNA sequencing to explore immune cell  
663 heterogeneity. *Nat. Rev. Immunol.* **18**, 35–45 (2017).
- 664 4. Ofengeim, D., Giagtzoglou, N., Huh, D., Zou, C. & Yuan, J. Single-Cell RNA  
665 Sequencing: Unraveling the Brain One Cell at a Time. *Trends Mol. Med.* **23**, 563–  
666 576 (2017).
- 667 5. Patel, A. P. *et al.* Single-cell RNA-seq highlights intratumoral heterogeneity in  
668 primary glioblastoma. *Science* **344**, 1396–401 (2014).
- 669 6. Tirosh, I. *et al.* Single-cell RNA-seq supports a developmental hierarchy in human  
670 oligodendrogloma. *Nature* **539**, 309–313 (2016).
- 671 7. Tirosh, I. *et al.* Dissecting the multicellular ecosystem of metastatic melanoma by  
672 single-cell RNA-seq. *Science* **352**, 189–96 (2016).
- 673 8. Venteicher, A. S. *et al.* Decoupling genetics, lineages, and microenvironment in  
674 IDH-mutant gliomas by single-cell RNA-seq. *Science (80-. )*. **355**, eaai8478  
675 (2017).
- 676 9. Darmanis, S. *et al.* Single-Cell RNA-Seq Analysis of Infiltrating Neoplastic Cells at  
677 the Migrating Front of Human Glioblastoma. *Cell Rep.* **21**, 1399–1410 (2017).
- 678 10. Chung, W. *et al.* Single-cell RNA-seq enables comprehensive tumour and  
679 immune cell profiling in primary breast cancer. *Nat. Commun.* **8**, 15081 (2017).
- 680 11. Zheng, C. *et al.* Landscape of Infiltrating T Cells in Liver Cancer Revealed by  
681 Single-Cell Sequencing. *Cell* **169**, 1342–1356.e16 (2017).
- 682 12. Horning, A. M. *et al.* Single-cell RNA-seq reveals a subpopulation of prostate  
683 cancer cells with enhanced cell cycle-related transcription and attenuated  
684 androgen response. *Cancer Res. canres.1924.2017* (2017). doi:10.1158/0008-  
685 5472.CAN-17-1924
- 686 13. Chen, K. H., Boettiger, A. N., Moffitt, J. R., Wang, S. & Zhuang, X. Spatially  
687 resolved, highly multiplexed RNA profiling in single cells. *Science* **348**, aaa6090  
688 (2015).
- 689 14. Shah, S., Lubeck, E., Zhou, W. & Cai, L. In Situ Transcription Profiling of Single  
690 Cells Reveals Spatial Organization of Cells in the Mouse Hippocampus. *Neuron*  
691 **92**, 342–357 (2016).
- 692 15. Long, X., Colonell, J., Wong, A. M., Singer, R. H. & Lionnet, T. Quantitative  
693 mRNA imaging throughout the entire Drosophila brain. *Nat. Methods* **14**, 703–706  
694 (2017).
- 695 16. Lee, J. H. *et al.* Fluorescent in situ sequencing (FISSEQ) of RNA for gene  
696 expression profiling in intact cells and tissues. *Nat. Protoc.* **10**, 442–458 (2015).
- 697 17. Achim, K. *et al.* High-throughput spatial mapping of single-cell RNA-seq data to  
698 tissue of origin. *Nat. Biotechnol.* **33**, 503–9 (2015).
- 699 18. Satija, R., Farrell, J. A., Gennert, D., Schier, A. F. & Regev, A. Spatial  
700 reconstruction of single-cell gene expression data. *Nat. Biotechnol.* **33**, 495–502

- 701 (2015).
- 702 19. Ståhl, P. L. *et al.* Visualization and analysis of gene expression in tissue sections  
703 by spatial transcriptomics. *Science* **353**, 78–82 (2016).
- 704 20. Junker, J. P. *et al.* Genome-wide RNA Tomography in the zebrafish embryo. *Cell*  
705 **159**, 662–75 (2014).
- 706 21. Chen, J. *et al.* Spatial transcriptomic analysis of cryosectioned tissue samples  
707 with Geo-seq. *Nat. Protoc.* **12**, 566–580 (2017).
- 708 22. Klein, A. M. *et al.* Droplet Barcoding for Single-Cell Transcriptomics Applied to  
709 Embryonic Stem Cells. *Cell* **161**, 1187–1201 (2015).
- 710 23. Ziegenhain, C. *et al.* Comparative Analysis of Single-Cell RNA Sequencing  
711 Methods. *Mol. Cell* **65**, 631–643.e4 (2017).
- 712 24. Wagner, F., Yan, Y. & Yanai, I. K-nearest neighbor smoothing for high-throughput  
713 single-cell RNA-Seq data. *bioRxiv* 217737 (2018). doi:10.1101/217737
- 714 25. Yang, J. *et al.* TM4SF1 Promotes Metastasis of Pancreatic Cancer via Regulating  
715 the Expression of DDR1. *Sci. Rep.* **7**, 45895 (2017).
- 716 26. Cao, J. *et al.* TM4SF1 Regulates Pancreatic Cancer Migration and Invasion  
717 &lt;b&gt;&lt;i&gt;In Vitro&lt;/i&gt;&lt;/b&gt; and &lt;b&gt;&lt;i&gt;In  
718 Vivo&lt;/i&gt;&lt;/b&gt;. *Cell. Physiol. Biochem.* **39**, 740–750 (2016).
- 719 27. Kopitar-Jerala, N. The Role of Interferons in Inflammation and Inflammasome  
720 Activation. *Front. Immunol.* **8**, 873 (2017).
- 721 28. Fuertes, M. B., Woo, S.-R., Burnett, B., Fu, Y.-X. & Gajewski, T. F. Type I  
722 interferon response and innate immune sensing of cancer. (2013).  
723 doi:10.1016/j.it.2012.10.004
- 724 29. Baron, M. *et al.* A Single-Cell Transcriptomic Map of the Human and Mouse  
725 Pancreas Reveals Inter- and Intra-cell Population Structure. *Cell Syst.* **3**, 346–  
726 360.e4 (2016).
- 727 30. Newman, A. M. *et al.* Robust enumeration of cell subsets from tissue expression  
728 profiles. *Nat. Methods* **12**, 453–457 (2015).
- 729 31. Noy, R. & Pollard, J. W. Tumor-Associated Macrophages: From Mechanisms to  
730 Therapy. *Immunity* **41**, 49–61 (2014).
- 731 32. Rasheed, Z. A., Matsui, W. & Maitra, A. *Pathology of pancreatic stroma in PDAC.*  
732 *Pancreatic Cancer and Tumor Microenvironment* (Transworld Research Network,  
733 2012).
- 734 33. Giacomello, S. *et al.* Spatially resolved transcriptome profiling in model plant  
735 species. *Nat. Plants* **3**, 17061 (2017).
- 736 34. Asp, M. *et al.* Spatial detection of fetal marker genes expressed at low level in  
737 adult human heart tissue. *Sci. Rep.* **7**, 12941 (2017).
- 738 35. Li, H. *et al.* Reference component analysis of single-cell transcriptomes elucidates  
739 cellular heterogeneity in human colorectal tumors. *Nat. Genet.* **49**, 708–718  
740 (2017).
- 741 36. Dobin, A. *et al.* STAR: ultrafast universal RNA-seq aligner. *Bioinformatics* **29**, 15–  
742 21 (2013).
- 743 37. Hashimshony, T. *et al.* CEL-Seq2: Sensitive highly-multiplexed single-cell RNA-  
744 Seq. *Genome Biol.* **17**, (2016).
- 745 38. Vogelstein, J. T., Gray Roncal, W., Vogelstein, R. J. & Priebe, C. E. Graph  
746 classification using signal-subgraphs: applications in statistical connectomics.



- 747 *IEEE Trans. Pattern Anal. Mach. Intell.* **35**, 1539–51 (2013).  
748 39. Huang, D. W., Sherman, B. T. & Lempicki, R. A. Systematic and integrative  
749 analysis of large gene lists using DAVID bioinformatics resources. *Nat. Protoc.* **4**,  
750 44–57 (2009).

751  
752

753 **Acknowledgements.** We thank Lidong Wang for assistance with the  
754 immunohistochemistry. We thank members of the Yanai lab for constructive  
755 comments.

756

757 **Author contributions.** Author contributions: R.M. performed the spatial transcriptomics  
758 and scRNA-Seq as well as the data analysis. F.W. contributed to scRNA-Seq and  
759 spatial transcriptomics analysis, as well as the ‘meta-gene’ analysis for deconvolution.  
760 M.C. contributed to spatial transcriptomics and scRNA-Seq processing. J.C.D.  
761 contributed to the deconvolution analysis. M.B. contributed expertise in scRNA-Seq  
762 processing and analysis. C.H.H. contributed histology analysis. D.M.S. contributed  
763 sample acquisition and immunohistochemistry analysis. I.Y. conceived the project,  
764 helped in the interpretation of the results and drafted the manuscript.

765

766 **Competing interests.** The authors declare no competing interests.

767

768 **Materials & Correspondence.** itai.yanai@nyum.org

Figure 1

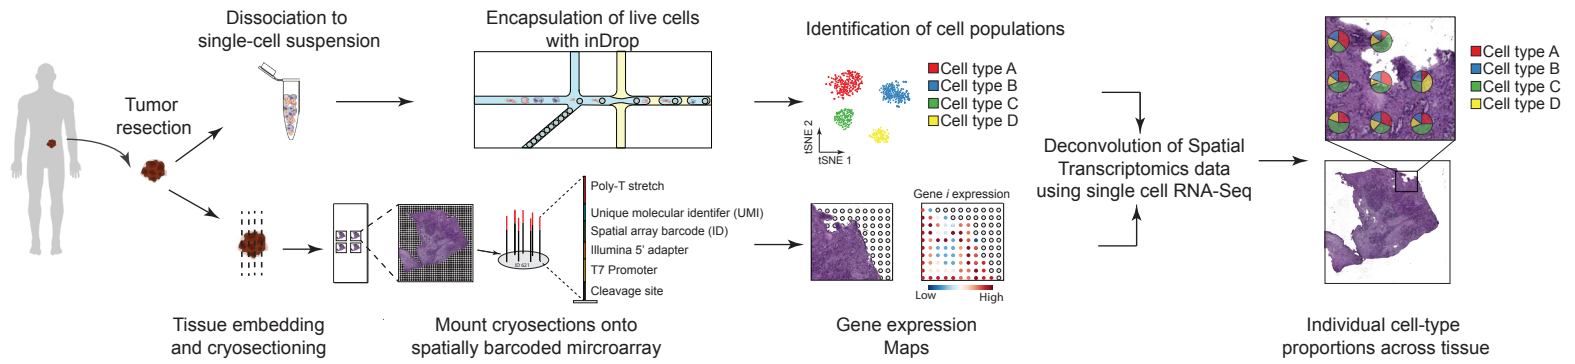

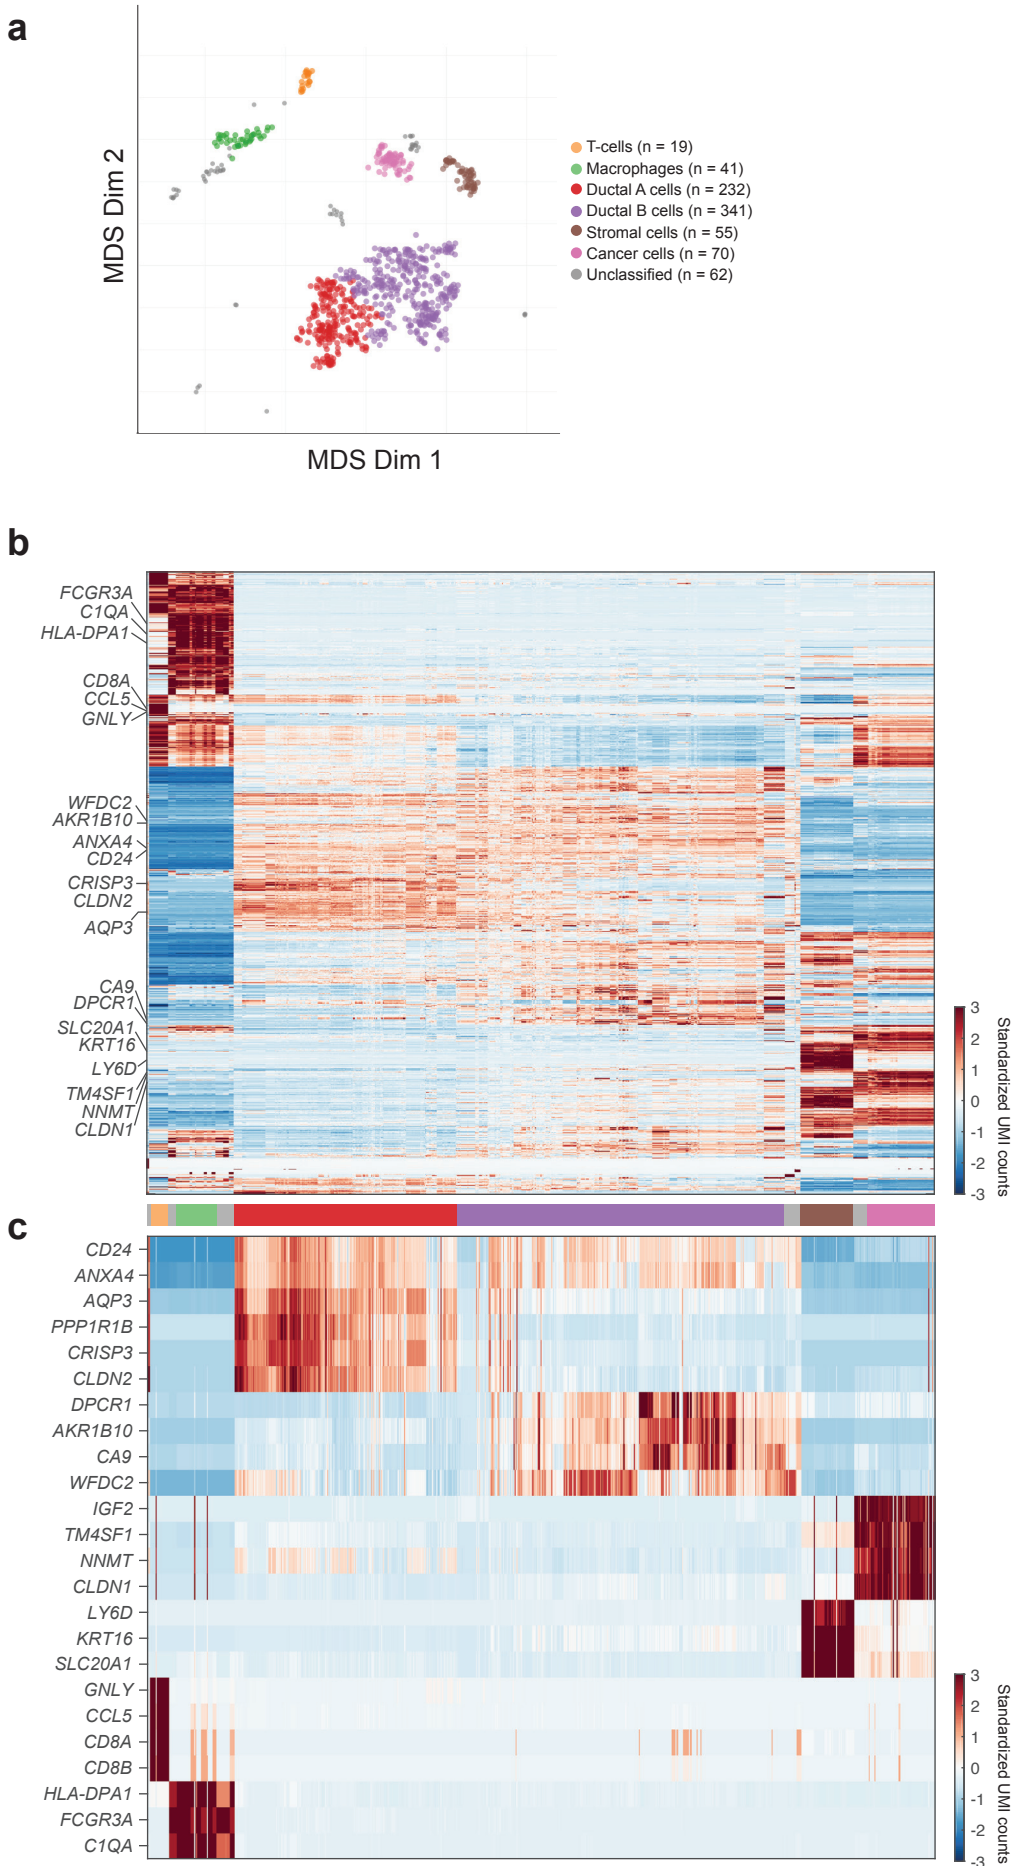

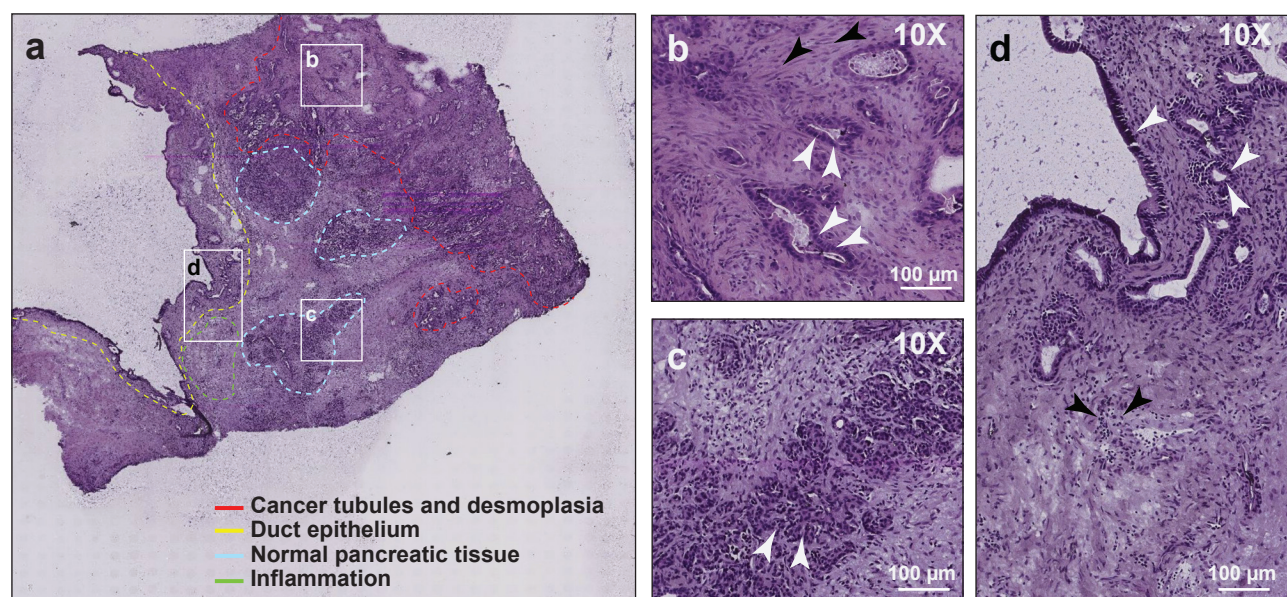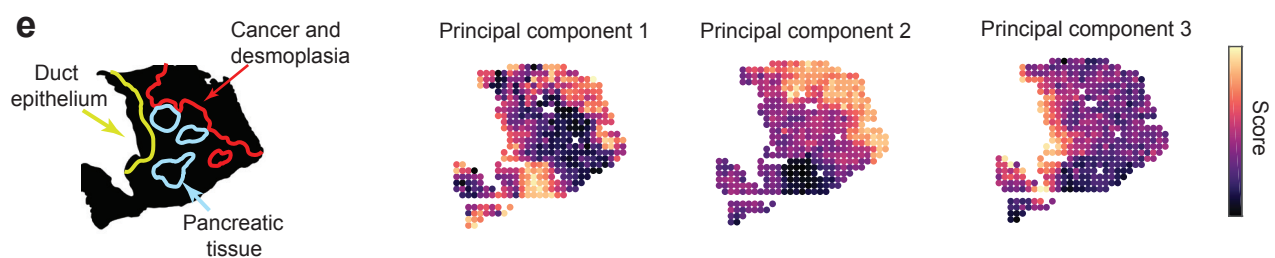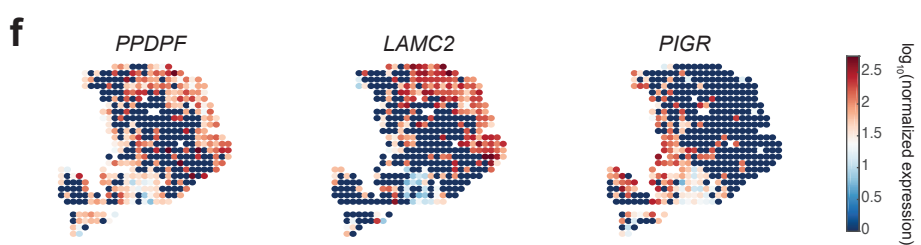

Figure 4

a

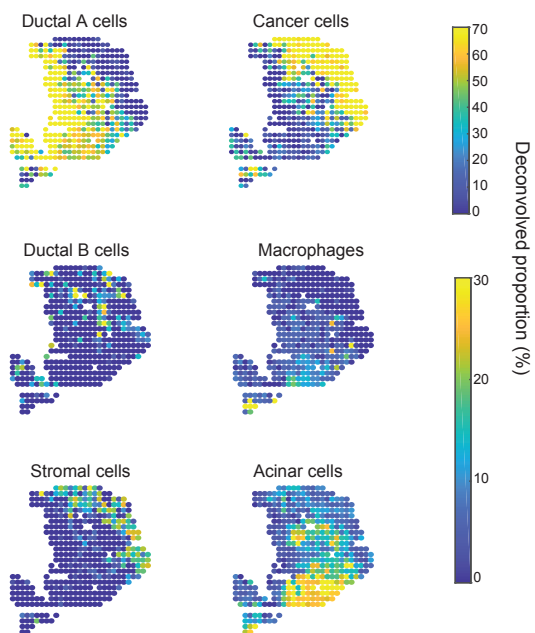

b

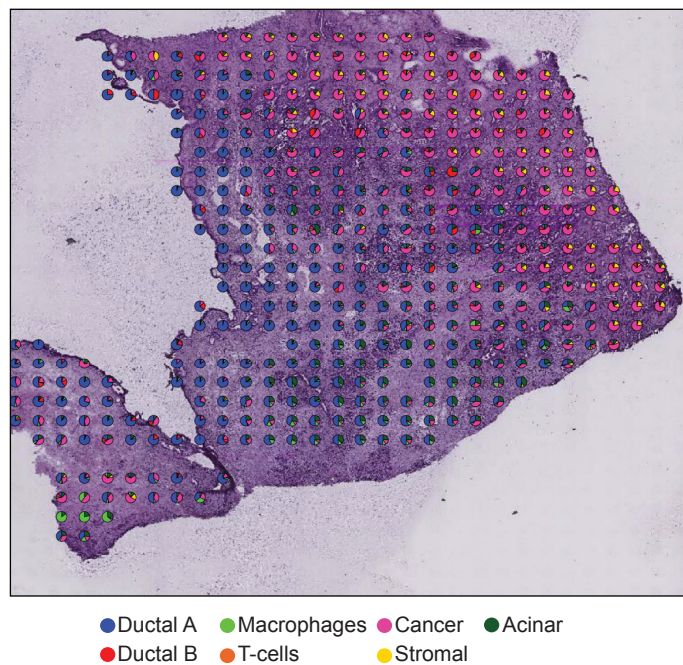

c

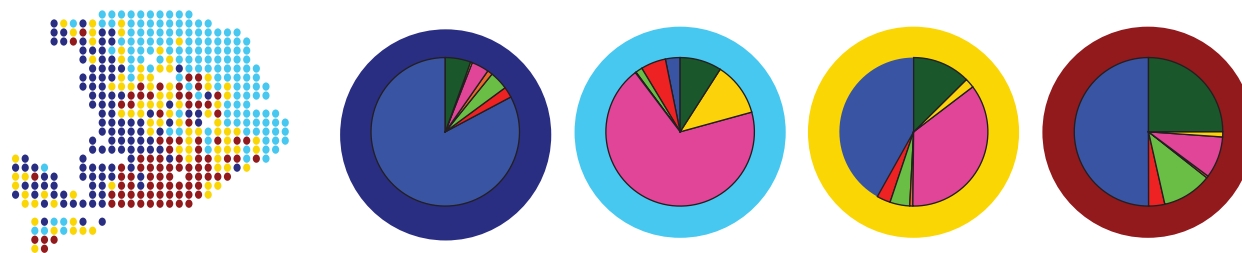

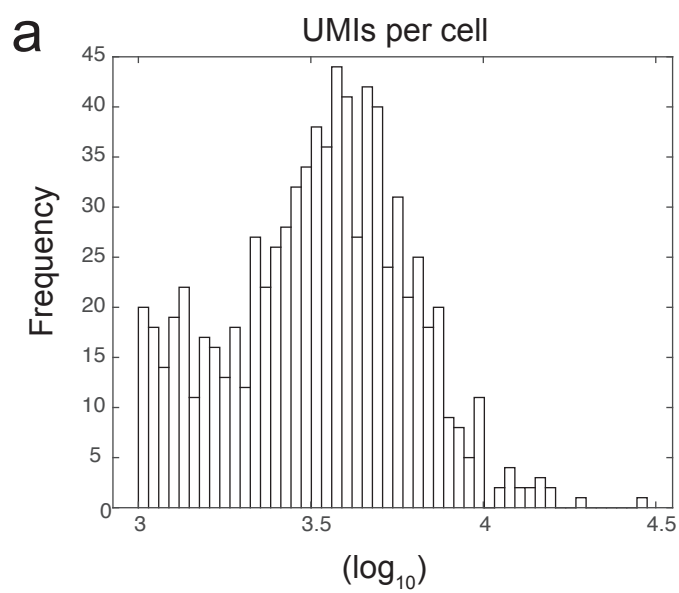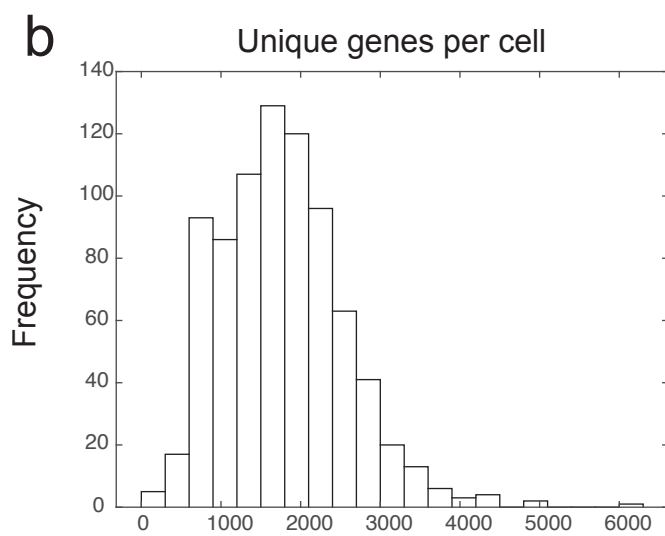

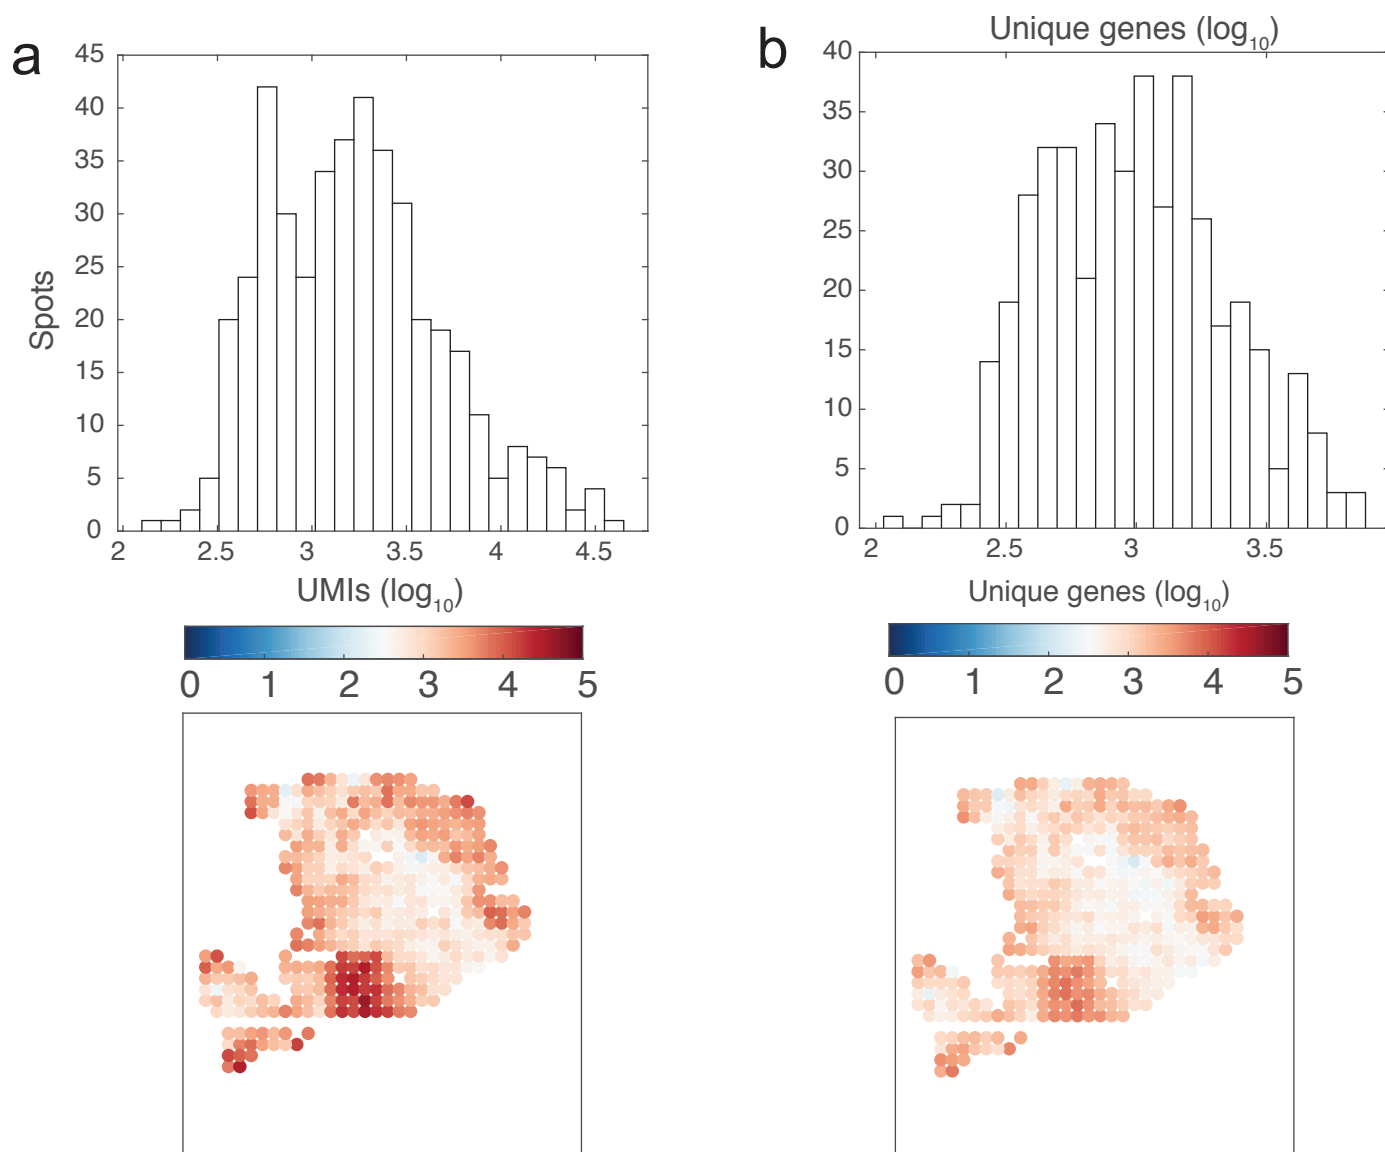

**C**

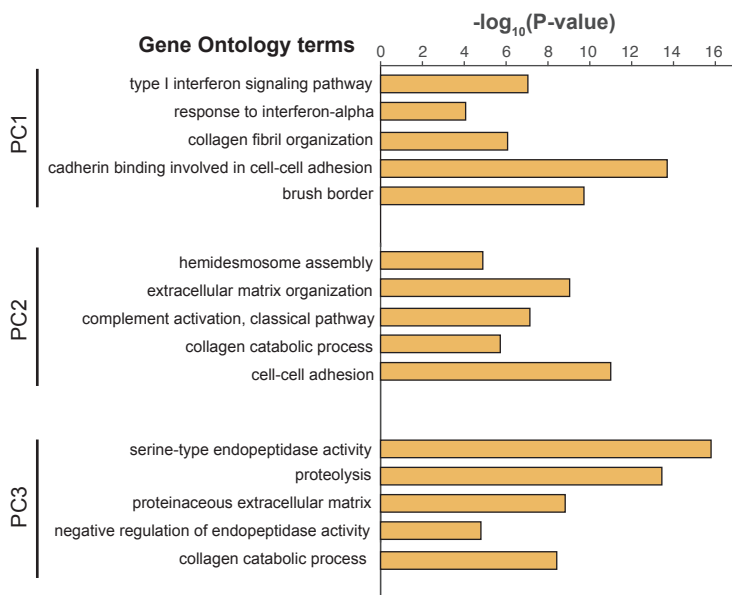

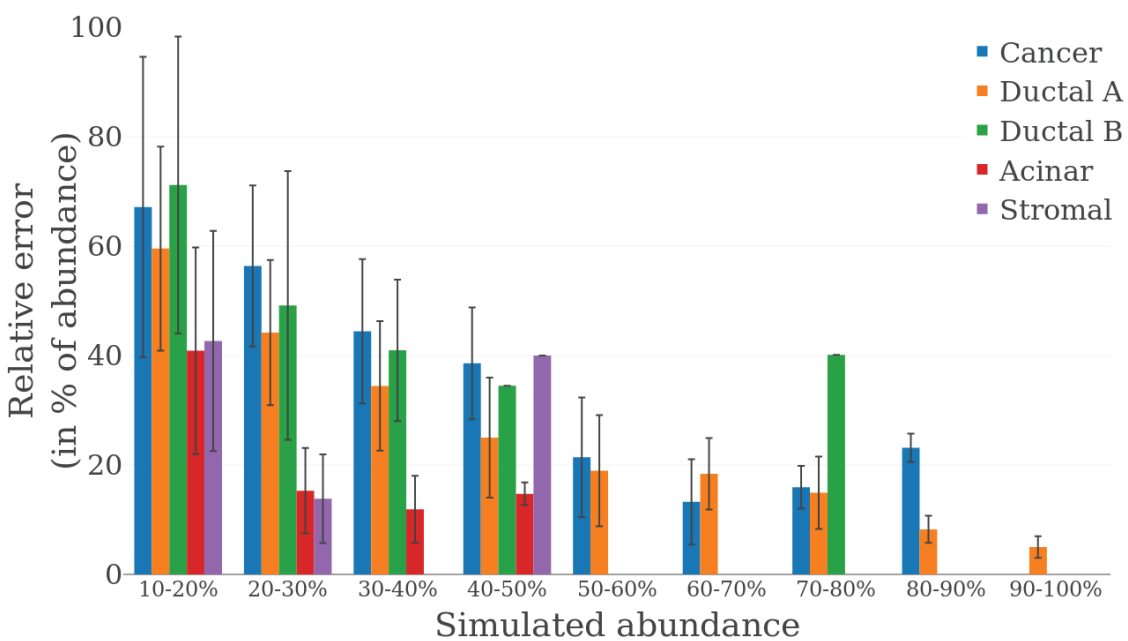



Figure 84

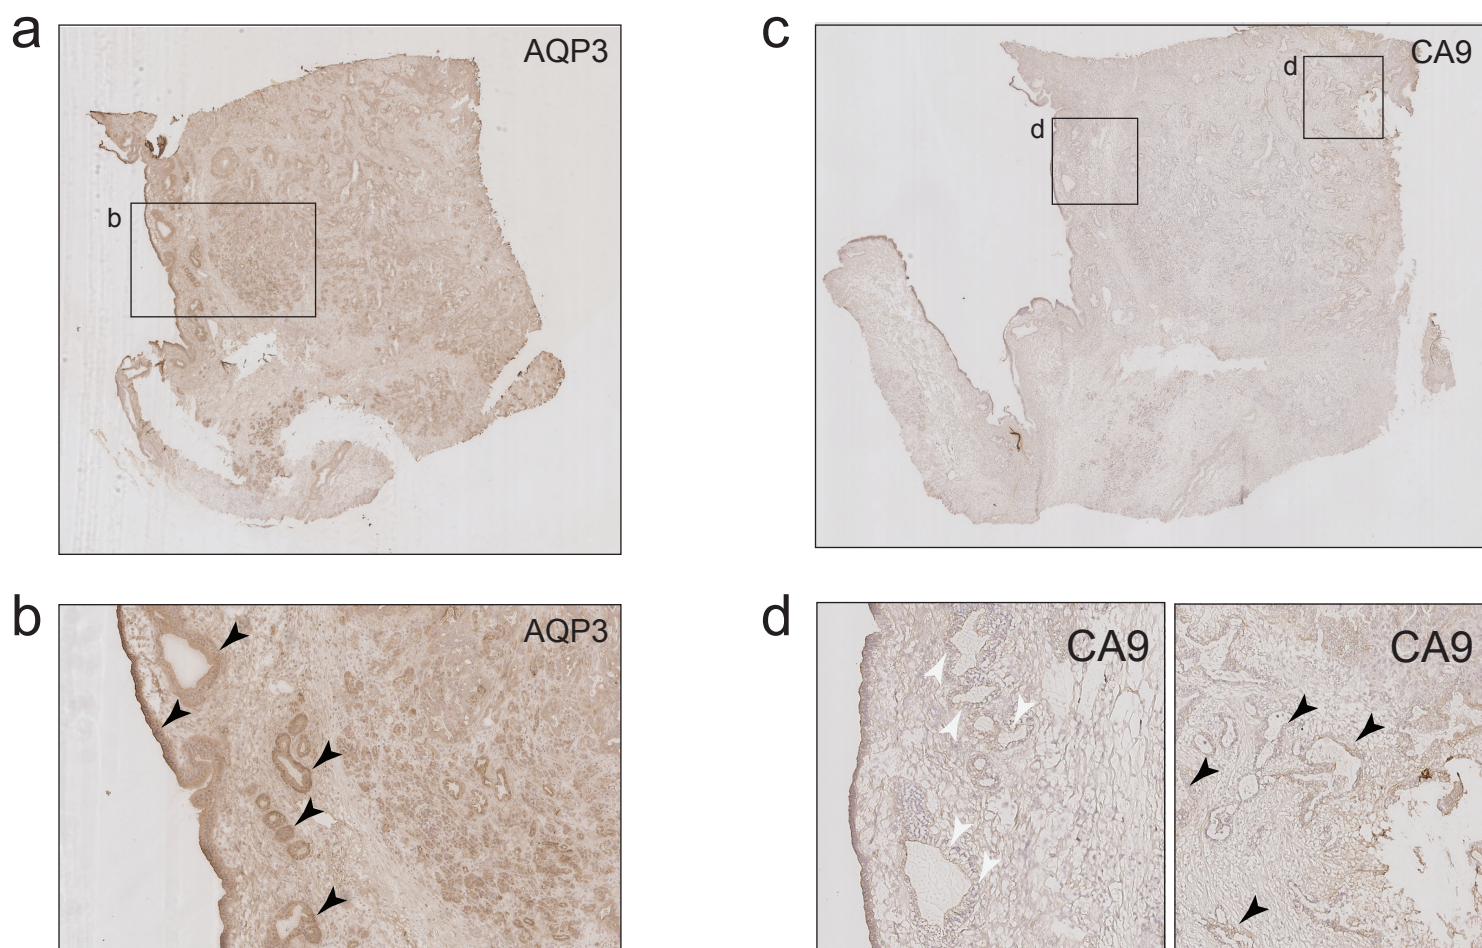

Source: https://www.biorxiv.org/content/10.1101/254375v2.full.pdf
